# Supplementary material for: Single-cell metal–phenolic nanocoatings protect strictly anaerobic methanogens for methane production at an atmospheric oxygen level
Source: Royal Society of Chemistry journal article supplement (doi:10.1039/d3en00471f), 2023-01-01
Supplement: d3en00471f1.pdf [file d3en00471f1.pdf]

## **Single-cell metal-phenolic nanocoatings protect strictly anaerobic methanogen for methane production under atmospheric oxygen level**

Jing-Ya Ma<sup>a, 1</sup>, Qi-Zhi Zhong<sup>b, c, 1</sup>, Xiao-Dong Sun<sup>a</sup>, Yang Yang<sup>b</sup>, Li-Juan Feng<sup>d</sup>, Jian-Lu Duan<sup>a</sup>, Xiao-Yu Liu<sup>a</sup>, Xiao-Hua Li<sup>a</sup>, Jingcheng Hao<sup>b</sup>, Jiwei Cui<sup>b\*</sup>, Xian-Zheng Yuan<sup>a, e\*</sup>

<sup>a</sup>Shandong Key Laboratory of Environmental Processes and Health, School of Environmental Science and Engineering, Shandong University, Qingdao, Shandong 266237, P. R. China

<sup>b</sup>Key Laboratory of Colloid and Interface Chemistry of the Ministry of Education, School of Chemistry and Chemical Engineering, Shandong University, Jinan, Shandong 250100, P. R. China

<sup>c</sup>Department of Chemical Engineering, The University of Melbourne, Parkville, Victoria 3010, Australia

<sup>d</sup>College of Geography and Environment, Shandong Normal University, Jinan, Shandong 250014, P. R. China

<sup>e</sup>Sino-French Research Institute for Ecology and Environment (ISFREE), Shandong University, Qingdao, Shandong 266237, P. R. China

<sup>1</sup>These authors contributed equally to this work.

\*Corresponding authors:

Jiwei Cui, E-mail: [jwcui@sdu.edu.cn](mailto:jwcui@sdu.edu.cn)

Xian-Zheng Yuan, E-mail: [xzyuan@sdu.edu.cn](mailto:xzyuan@sdu.edu.cn)

This supporting information contains 15 pages with 9 figures and 4 tables.

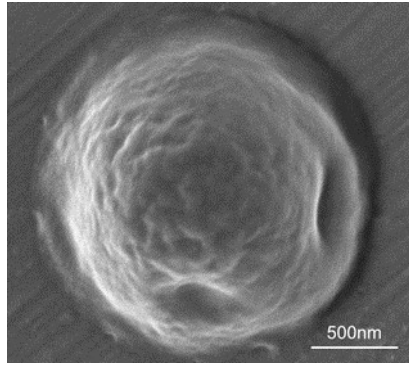

Figure S1. SEM images of *M. acetivorans* with 1.2 mM  $\text{FeCl}_2 \cdot 4\text{H}_2\text{O}$ , 0.12 mM TA under anaerobic environment.

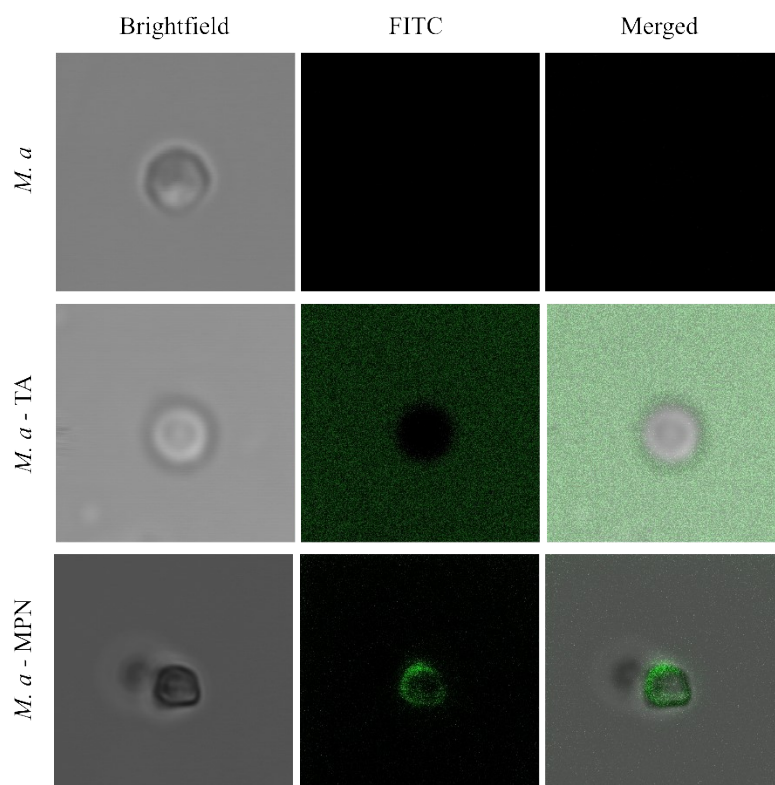

**Figure S2.** Confocal fluorescence microscopy bright-field and fluorescence images of native, FITC-labeled TA, FITC-labeled TA and  $\text{Fe}^{2+}$  (MPN) assembled *M. acetivorans* (abbreviated as *M. a.* in the figure). TA cannot adsorb on the surface of *M. acetivorans* without  $\text{Fe}^{2+}$ , indicating that MPN formation on *M. acetivorans* requires the presence of both  $\text{Fe}^{2+}$  and TA.

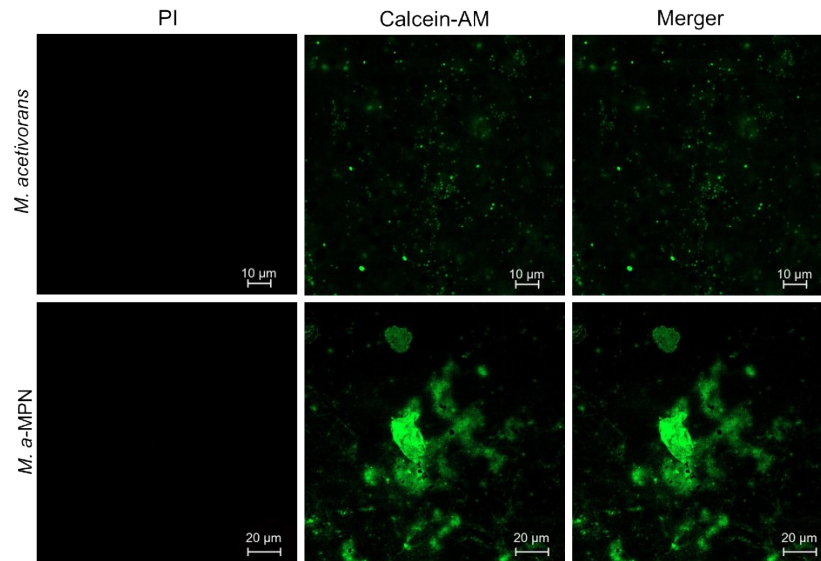

**Figure S3.** Confocal fluorescence microscopy images of *M. acetivorans* and MPN-coated *M. acetivorans* (*M. a-MPN*), depicting cell viability. Red fluorescence (PI dye) indicates dead cells, while green (Calcein-AM) signifies all cells.

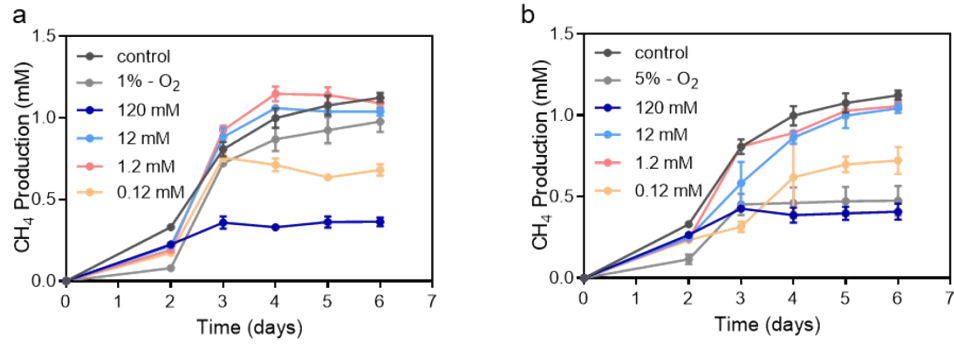

**Figure S4. *M. acetivorans*-coated MPN optimization.** Methane production profiles by MPN-coated *M. acetivorans*, with coatings prepared with Fe<sup>2+</sup> (0.12, 1.2, 12 and 120 mM) and TA (0.012, 0.12, 1.2 and 12 mM) under (a) 1% and (b) 5% oxygen. The methanogenesis of the MPN-coated *M. acetivorans* (MPN coating: 0.12 mM TA, 1.2 mM FeCl<sub>2</sub>·4H<sub>2</sub>O) was not significantly different from that of the control group regardless of the oxygen concentration (1% or 5%). MPN coatings prepared at concentrations of 0.12 mM TA and 1.2 mM FeCl<sub>2</sub>·4H<sub>2</sub>O were used as the encapsulation material in subsequent experiments. Values are the mean of three biological replicates. Data are shown as the mean ± SD (*n* = 5).

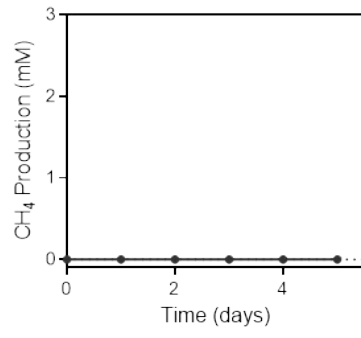

**Figure S5.** Methanogenic curve of MPN incubated in an anaerobic environment.

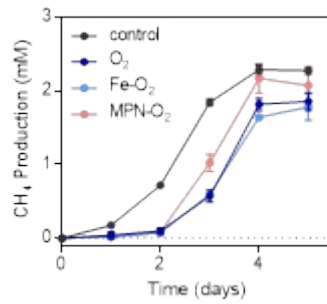

**Figure S6.** Methanogenic curves of *M. acetivorans* incubated in an anaerobic environment after 7 days of incubation under normal (anaerobic) (control), 21% oxygen (O<sub>2</sub>), 1.2 mM FeCl<sub>2</sub> and 21% oxygen (Fe-O<sub>2</sub>), and MPN (0.12 mM TA, 1.2 mM FeCl<sub>2</sub>·4H<sub>2</sub>O) and 21% oxygen (MPN-O<sub>2</sub>) conditions. Values are the mean of three biological replicates. Data are shown as the mean ± SD ( $n = 5$ ).

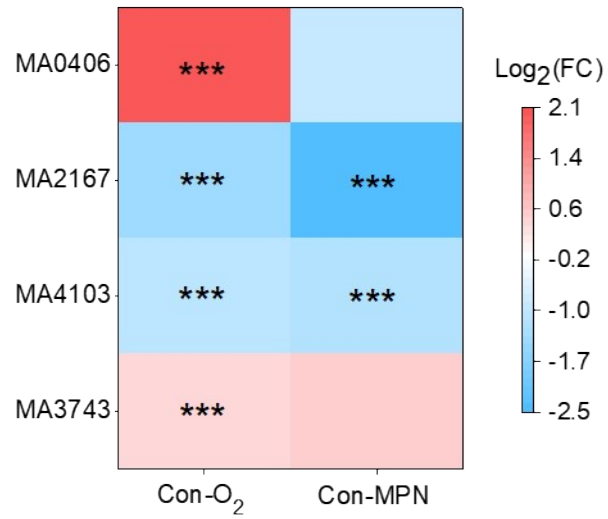

**Figure S7.** Transcript abundance analysis of methanogenic genes in *M. acetivorans* in 21% O<sub>2</sub> relative to anaerobic control (Con-O<sub>2</sub>), and MPN-coated *M. acetivorans* in 21% O<sub>2</sub> relative to anaerobic control (Con-MPN), presented as log<sub>2</sub>(fold change) values. \**P* < 0.05, \*\**P* < 0.01, \*\*\**P* < 0.001 (negative binomial distribution).



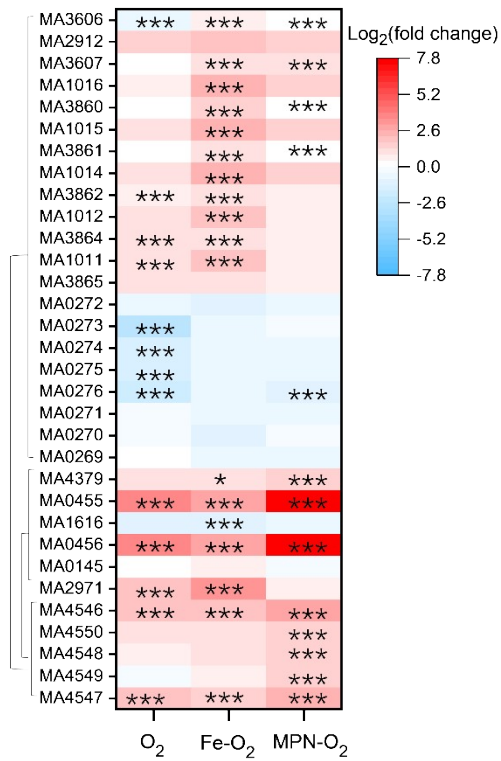

**Figure S8.** Transcript abundance analysis of methanogenic genes in *M. acetivorans* cultured for 3 days in 21% oxygen (O<sub>2</sub>), 1.2 mM FeCl<sub>2</sub> and 21% oxygen (Fe-O<sub>2</sub>), or MPN (0.12 mM TA, 1.2 mM FeCl<sub>2</sub>·4H<sub>2</sub>O) and 21% oxygen (MPN-O<sub>2</sub>), presented as log<sub>2</sub>(fold change) values. \**P* < 0.05, \*\**P* < 0.01, \*\*\**P* < 0.001 (negative binomial distribution).

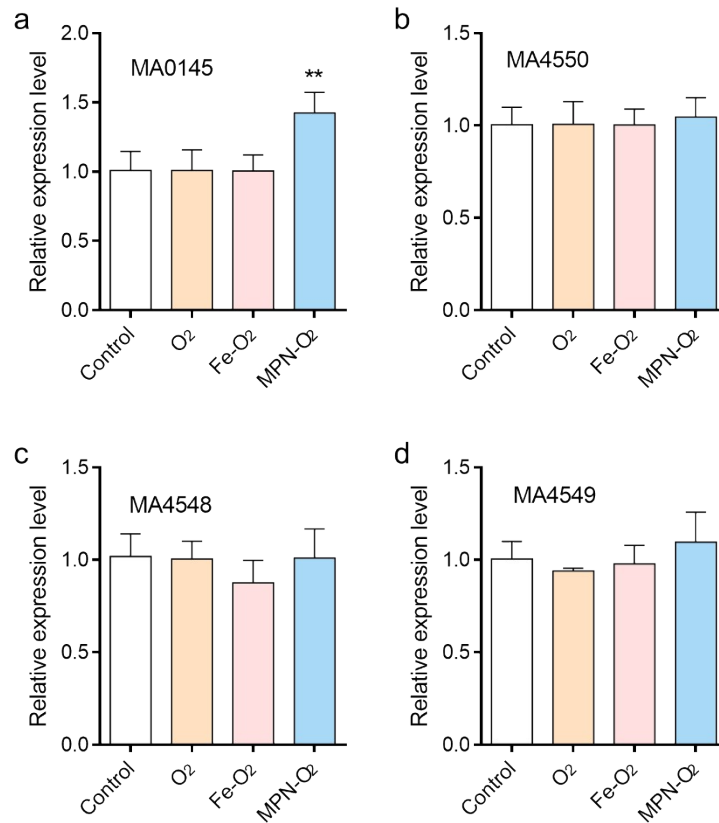

**Figure S9.** qPCR validation of methanogenesis metabolism-related genes (a) MA0145, (b) MA4550, (c) MA4548, and (d) MA4549 in *M. acetivorans* cultured for 2 days under normal (anaerobic) (Control), 21% oxygen (O<sub>2</sub>), 1.2 mM FeCl<sub>2</sub> and 21% oxygen (Fe-O<sub>2</sub>), or MPN (0.12 mM TA, 1.2 mM FeCl<sub>2</sub>·4H<sub>2</sub>O) and 21% oxygen (MPN-O<sub>2</sub>) conditions. Values are the mean of three biological replicates. Data are shown as the mean ± SD ( $n = 3$ ), \* $P < 0.05$ , \*\* $P < 0.01$ , \*\*\* $P < 0.001$  (two-tailed  $t$ -test).

**Table S1.** Composition of the anaerobic medium used for *M. acetivorans* culture

| Component                                            | Concentration (g/L) |
|------------------------------------------------------|---------------------|
| NaCl                                                 | 23.400              |
| NaHCO <sub>3</sub>                                   | 4.000               |
| Yeast extract                                        | 1.000               |
| MgSO <sub>4</sub> ·7H <sub>2</sub> O                 | 9.450               |
| Na <sub>2</sub> HPO <sub>4</sub> ·12H <sub>2</sub> O | 1.510               |
| NH <sub>4</sub> Cl                                   | 1.000               |
| KCl                                                  | 0.800               |
| CaCl <sub>2</sub>                                    | 0.106               |
| Nitrilotriacetic acid                                | 1.500               |
| MgSO <sub>4</sub> ·7H <sub>2</sub> O                 | 3.000               |
| MnSO <sub>4</sub> ·H <sub>2</sub> O                  | 0.500               |
| NaCl                                                 | 1.000               |
| FeSO <sub>4</sub> ·7H <sub>2</sub> O                 | 0.100               |
| CoSO <sub>4</sub> ·7H <sub>2</sub> O                 | 0.100               |
| CaCl <sub>2</sub> ·2H <sub>2</sub> O                 | 0.100               |
| ZnSO <sub>4</sub> ·7H <sub>2</sub> O                 | 0.100               |
| CuSO <sub>4</sub> ·5H <sub>2</sub> O                 | 0.010               |
| AlK(SO <sub>4</sub> ) <sub>2</sub>                   | 0.010               |
| H <sub>3</sub> BO <sub>3</sub>                       | 0.010               |
| Na <sub>2</sub> MoO <sub>4</sub> ·2H <sub>2</sub> O  | 0.010               |

**Table S2.** Thickness of MPN films formed at different times for O<sub>2</sub> and methanol separation studies

| Time (h)       | O <sub>2</sub> separation study |        |        |         | Methanol separation study |        |        |          |
|----------------|---------------------------------|--------|--------|---------|---------------------------|--------|--------|----------|
|                | 2                               | 4      | 6      | 14      | 0.5                       | 1      | 2      | 12       |
| Thickness (nm) | 25 ± 4                          | 48 ± 2 | 57 ± 4 | 157 ± 7 | 15 ± 1                    | 16 ± 2 | 26 ± 4 | 142 ± 19 |

**Table S3.** Transcript analysis for genes identified in methanogenic metabolic pathway

| Locus tag | Gene name | Log <sub>2</sub> (fold change) |                   |                    | P-value        |                   |                    |
|-----------|-----------|--------------------------------|-------------------|--------------------|----------------|-------------------|--------------------|
|           |           | O <sub>2</sub>                 | Fe-O <sub>2</sub> | MPN-O <sub>2</sub> | O <sub>2</sub> | Fe-O <sub>2</sub> | MPN-O <sub>2</sub> |
| MA3606    | AckA      | -0.563471555                   | 0.722207389       | 0.099228931        | 0.000222645    | 0.000488025       | 0.574970085        |
| MA2912    | AcsM3     | 1.540896511                    | 2.089510428       | 1.613786086        | 9E-17          | 6.95E-15          | 1.44E-13           |
| MA1016    | CdhA1     | 0.822552025                    | 2.450884118       | 1.465549063        | 7.96E-08       | 3.14E-25          | 2.28E-12           |
| MA3860    | CdhA2     | 0.104182662                    | 1.330185667       | 0.408697394        | 0.569065996    | 3.43E-09          | 0.026174295        |
| MA1015    | CdhB1     | 1.071049515                    | 2.364207674       | 1.65772676         | 0.000000042    | 3.83E-25          | 2.53E-13           |
| MA3861    | CdhB2     | 0.18842842                     | 1.053562086       | 0.431857651        | 0.251005127    | 0.000000948       | 0.024607331        |
| MA1014    | CdhC1     | 0.938302858                    | 2.401984094       | 1.550963431        | 1.61E-08       | 8.42E-23          | 2.55E-13           |
| MA3862    | CdhC2     | 0.610378654                    | 1.039316878       | 0.516442156        | 0.000124931    | 0.0000034         | 0.00434895         |
| MA1012    | CdhD1     | 1.209248571                    | 2.006765403       | 0.664670792        | 9.15E-15       | 1.86E-19          | 0.000975137        |
| MA3864    | CdhD2     | 0.890785447                    | 1.03886697        | 0.571213354        | 9.81E-09       | 0.00000201        | 0.001429694        |
| MA1011    | CdhE1     | 1.22818701                     | 1.942232696       | 0.552241895        | 7.95E-13       | 2.51E-18          | 0.006280797        |
| MA3865    | CdhE1     | 1.023396596                    | 1.076517769       | 0.484849788        | 2.22E-10       | 0.00000103        | 0.00877315         |
| MA0272    | MtrA      | -0.757144872                   | -0.959753575      | -0.597236581       | 0.00000061     | 0.000815034       | 0.001311405        |
| MA0273    | MtrB      | -2.632324963                   | -0.637810907      | -0.432808801       | 5.27E-44       | 0.110732609       | 0.068961098        |
| MA0274    | MtrC      | -1.624733411                   | -0.75099505       | -0.433382665       | 3.29E-25       | 0.016464814       | 0.02511098         |
| MA0275    | MtrD      | -1.419614577                   | -0.772684655      | -0.600011352       | 9.35E-20       | 0.013158603       | 0.00138382         |
| MA0276    | MtrE      | -1.923246723                   | -0.659882041      | -1.255293456       | 5.13E-34       | 0.036341447       | 1.21E-10           |
| MA0271    | MtrF      | -0.10296484                    | -0.853116023      | -0.725350205       | 0.577338976    | 0.028291374       | 0.004760933        |
| MA0270    | MtrG      | -0.368165079                   | -0.919824395      | -0.426445834       | 0.13827599     | 0.010924336       | 0.072081631        |
| MA0269    | MtrH      | 0.113023908                    | -0.831108748      | -0.462087641       | 0.482500549    | 0.001009268       | 0.007408783        |
| MA4379    | MtaA      | 0.996532505                    | 1.1097553         | 1.424043752        | 5.16E-10       | 0.000000366       | 5.29E-14           |
| MA0455    | MtaB      | 3.49457005                     | 2.741394376       | 7.758330485        | 2E-86          | 2.79E-16          | 3.43E-220          |
| MA1616    | MtaB1     | -0.971260754                   | -1.112445169      | -0.861890699       | 0.00000139     | 0.000158874       | 0.000121517        |
| MA0456    | MtaC      | 3.703494974                    | 2.715281367       | 7.786107409        | 1.48E-91       | 6.17E-17          | 1.1E-213           |
| MA0145    | MtmC1     | 0.100513737                    | 0.698552752       | -0.160808743       | 0.588218066    | 0.005048935       | 0.526145703        |
| MA2971    | MtmC      | 1.868896431                    | 3.270518716       | 0.808425902        | 2.66E-16       | 3.99E-14          | 0.02705676         |
| MA4546    | McrA      | 1.89587011                     | 1.752963405       | 2.74845581         | 7.67E-26       | 2.97E-10          | 1.3E-35            |
| MA4550    | McrB      | 0.968565084                    | 0.878715954       | 1.389506794        | 7.17E-09       | 0.001852266       | 2.63E-12           |

|        |       |              |             |             |             |             |             |
|--------|-------|--------------|-------------|-------------|-------------|-------------|-------------|
| MA4548 | Mcrc  | 0.668057164  | 0.878810454 | 1.647918392 | 0.0000379   | 0.000642359 | 1.62E-19    |
| MA4549 | McrcD | -0.270360511 | 0.794411823 | 1.338704035 | 0.091856609 | 0.002964413 | 7.22E-13    |
| MA4547 | McrcG | 1.750885758  | 1.315501124 | 2.413948104 | 1.18E-21    | 0.0000115   | 1.56E-26    |
| MA2167 | Isf   | -1.363878    | -0.756775   | -2.504374   | 1.48829E-11 | 0.00044     | 2.8016E-21  |
| MA0406 | Isf   | 2.125658     | 1.374984    | -0.886991   | 1.3758E-07  | 0.00277     | 0.211682    |
| MA3743 | FprA  | 0.400687     | 0.823335    | 0.480182    | 0.000958    | 6.94182E-05 | 0.062069    |
| MA4103 | \     | -0.995635    | -1.11847    | -1.153404   | 2.17531E-08 | 1.704E-07   | 4.48234E-07 |

---

**Table S4.** Primers used in this study<sup>a</sup>

| Primer name  | Sequence (5'→3')         |
|--------------|--------------------------|
| Arc349f      | GYGCASCAGKCGMGAAW        |
| Arc806r      | GGACTACVSGGGTATCTAAT     |
| ma1616-qpcrf | TACGACTGTGCTCTGATGAATG   |
| ma1616-qpcrr | CTATCGCCTCTCCTACTCTGTAA  |
| ma4379-qpcrf | CACACCAACCCTGAACTGAT     |
| ma4379-qpcrr | GACAAGGACAGTAAGGCAGTAG   |
| ma0145-qpcrf | GAAGCTGCTGAGGTCTTTCTAC   |
| ma0145-qpcrr | GGTTCCTTCCTCTCCTTCTACT   |
| ma4550-qpcrf | AACGAAGGTCTTGGCTTCTC     |
| ma4550-qpcrr | GATACCGGACTGCTCATAGATTG  |
| ma4548-qpcrf | GTGAGTGTGCTTGTACTCTACTC  |
| ma4548-qpcrr | CATTTCAATCTGTGCGACTTCTAC |
| ma4549-qpcrf | TTCAGATCGGAGATCAGGTTATTG |
| ma4549-qpcrr | GGAGCATCTTGTTCGCATACT    |

<sup>a</sup> “f” indicates forward primer and “r” indicates reverse primer. A one-letter code for degenerate bases is used according to the International Union of Biochemistry (IUB), where Y stands for C, T; K for G, T; S for C+G; W for A, T; and M for A, C.
